# Supplementary material for: HSP60 controls mitochondrial ATP generation for optimal virus-specific IL-21-producing CD4 and cytotoxic CD8 memory T cell responses
Source: PubMed Central journal article supplement (PMC11663223; doi:10.1038/s42003-024-07326-8), 2024-12-21
Supplement: 42003_2024_7326_MOESM3_ESM.pdf [file 42003_2024_7326_MOESM3_ESM.pdf]

## Description of Additional Supplementary Files

**File name:** Supplementary Data

**Description:** All numerical source data for graphs
